# Supplementary material for: Development and validation of the Global Adolescent and Child Physical Activity Questionnaire (GAC-PAQ) in 14 countries: study protocol
Source: PubMed Central journal article supplement — BMJ Open. 2024 Jul 24;14(7):e082275. doi: 10.1136/bmjopen-2023-082275 (PMC11284885; doi:10.1136/bmjopen-2023-082275), 2024-07-24
Supplement: bmjopen-14-7-s001.pdf [file bmjopen-14-7-s001.pdf]

**Supplementary File 1. Global Adolescent and Children Physical Activity Questionnaire (GAC-PAQ) project team members.**

| <b>Member (highest degree)</b> | <b>Primary affiliation/titles</b>                                                                                                                                                                                                                                                                | <b>Role in the project</b>                                                                                                                              | <b>Main areas of expertise</b>                                                                                                                                                         |
|--------------------------------|--------------------------------------------------------------------------------------------------------------------------------------------------------------------------------------------------------------------------------------------------------------------------------------------------|---------------------------------------------------------------------------------------------------------------------------------------------------------|----------------------------------------------------------------------------------------------------------------------------------------------------------------------------------------|
| Richard Larouche (PhD)         | Associate Professor and Chair of Graduate Public Health Programs, University of Lethbridge; Board of Governors Research Chair in Children's Physical Activity                                                                                                                                    | Principal Investigator and Co-Lead Investigator (Canada), Member of the Steering Committee and Accelerometer Sub-Committee; KT/JEDI Sub-Committee Chair | Active transportation, epidemiology, public health, knowledge translation, kinesiology                                                                                                 |
| Mark S. Tremblay (PhD)         | Senior Scientist, Healthy Active Living and Obesity Research Group, CHEO Research Institute; Full Professor of Pediatrics, University of Ottawa; President, Active Healthy Kids Global Alliance; Founder and Chair, Outdoor Play Canada; Founder and Chair, Sedentary Behaviour Research Network | Principal Investigator and Co-Lead Investigator (Canada), Member of the Steering Committee and KT/JEDI Sub-Committee; Chair Accelerometer Sub-Committee | Physical activity surveillance, movement behaviour measurement, pediatric exercise science, kinesiology                                                                                |
| Salomé Aubert (PhD)            | Publication Committee Chair and Oceania Representative, Active Healthy Kids Global Alliance; International Board of Advisors member, American Sport Institute                                                                                                                                    | Member of the Steering Committee and KT/JEDI Sub-Committee Member                                                                                       | Movement behavior surveillance, international comparisons                                                                                                                              |
| Jasmin Bhawra (PhD)            | Assistant Professor, School of Occupational and Public Health, Toronto Metropolitan University; Director, CHANGE Research Lab; Co-Leader for India Report Card on Physical Activity among Children and Youth; Co-Founder of Active Healthy Kids India                                            | Country Co-Lead Investigator (India); Member of the KT/JEDI Sub-Committee Member                                                                        | Active living, population health, children and youth, mixed methods, digital health, program evaluation, health policy, community-based participatory research, knowledge mobilization |

|                             |                                                                                                                                                                                                                                                       |                                                                               |                                                                                                                                             |
|-----------------------------|-------------------------------------------------------------------------------------------------------------------------------------------------------------------------------------------------------------------------------------------------------|-------------------------------------------------------------------------------|---------------------------------------------------------------------------------------------------------------------------------------------|
| Javier Brazo-Sayavera (PhD) | Associate Professor, Universidad Pablo de Olavide (Seville, Spain). Head of the Active Healthy Kids Spanish Network. Chair of the Communications Committee at the Active Healthy Kids Global Alliance.                                                | Country Lead Investigator (Spain); Member of the KT/JEDI Sub-Committee Member | Physical activity and physical fitness in children and adolescents                                                                          |
| Valerie Carson (PhD)        | Professor, Faculty of Kinesiology, Sport, and Recreation; University of Alberta                                                                                                                                                                       | Steering Committee Member                                                     | Physical activity and sedentary behaviour in preschoolers, children, and adolescents. Socio-emotional and cognitive development.            |
| Rachel Colley (PhD)         | Senior Research Analyst, Health Analysis Division, Strategic Data Management, Methods and Analysis, Statistics Canada                                                                                                                                 | Knowledge User and Steering Committee Member                                  | Physical activity surveillance and measurement                                                                                              |
| Dale Esliger (PhD)          | Reader in Digital Health, School of Sport, Exercise, and Health Sciences; Loughborough University                                                                                                                                                     | Accelerometry Sub-Committee Member                                            | Physical activity surveillance, movement behaviour measurement, accelerometry                                                               |
| Silvia Gonzalez (PhD)       | Research Associate at the Research Group of Epidemiology at Universidad de los Andes                                                                                                                                                                  | Steering Committee Member                                                     | Physical activity and sedentary behaviours surveillance in children, active transportation, and community-based physical activity programs. |
| Ryan Harper-Brown (MFA)     | Instructor and Internship Coordinator, University of Lethbridge Department of New Media                                                                                                                                                               | Steering Committee Member and App Developer                                   | New media, video production, media development.                                                                                             |
| Alejandra Jauregui (DSc)    | Chair of the Department of Physical Activity and Healthy Lifestyles, Center for Health and Nutrition Research, National Institute of Public Health; Founder and Board Member of the Latin American Society for Physical Activity and Health Research. | Country Lead Investigator (Mexico); KT/JEDI Sub-Committee Member              | Environmental and policy determinants of physical activity, policy and school-based interventions                                           |
| Piyawat Katewongsa (PhD)    | Associate Professor, Institute for Population and Social Research, Mahidol University, Thailand; Director,                                                                                                                                            | Country Co-Lead Investigator (Thailand)                                       | Demography, population health, health promotion, physical activity.                                                                         |

|                          |                                                                                                                                                                                                           |                                                                          |                                                                                                                                        |
|--------------------------|-----------------------------------------------------------------------------------------------------------------------------------------------------------------------------------------------------------|--------------------------------------------------------------------------|----------------------------------------------------------------------------------------------------------------------------------------|
|                          | Thailand Physical Activity Knowledge Development Centre (TPAK).                                                                                                                                           |                                                                          |                                                                                                                                        |
| Anuradha Khadilkar (MD)  | Consultant Pediatrician and Deputy Director, Hirabai Cowasji Jehangir Medical Research Institute, Jehangir Hospital, India.                                                                               | Country Co-Lead Investigator (India)                                     | Childhood growth, nutrition, bone health and endocrine disorders, community-based research.                                            |
| Geoff Kira (PhD)         | Associate Professor Te Hau Kori, Te Herenga Waka – Victoria University of Wellington, Wellington, Aotearoa New Zealand. Co-director, Te Hau Kori, Centre for Physical Activity and Wellbeing.             | Country Co-Lead Investigator (New Zealand); KT/JEDI Sub-Committee Member | Māori sport and physical activity, health promotion, social determinants of health, health equity, and public health nutrition.        |
| Nicholas Kuzik (PhD)     | Postdoctoral Fellow, CHEO Research Institute; Analyst, Centre for Population Health Data, Canadian Health Measures Survey (Accelerometer Expert)                                                          | Accelerometry Sub-Committee Member                                       | Accelerometer data measurement and analyses.                                                                                           |
| Yang Liu (PhD)           | Professor, School of Physical Education, Shanghai University of Sport                                                                                                                                     | Country Lead Investigator (China); Accelerometry Sub-Committee Member    | Physical activity and health promotion, physical and health education                                                                  |
| Marie Löf (PhD)          | Professor, Department of Biosciences and Nutrition, Karolinska Institutet, Sweden                                                                                                                         | Country Lead Investigator (Sweden)                                       | Physical activity measurements (including accelerometry), pediatric obesity and digital interventions for health promotion in children |
| Tom Loney (PhD)          | Professor of Public Health and Epidemiology, College of Medicine, Mohammed Bin Rashid University of Medicine and Health Sciences, Dubai, United Arab Emirates                                             | Country Lead Investigator (United Arab Emirates)                         | Epidemiology, physical activity, public health                                                                                         |
| Taru Manyanga (PhD)      | Assistant Professor of Physical Therapy, University of Northern British Columbia; Country Lead, Active Healthy Kids Zimbabwe; Africa representative, Executive Board, Active Healthy Kids Global Alliance | Steering Committee Member; KT/JEDI Sub-Committee Member                  | Measurement of movement behaviors, epidemiology, physical therapy                                                                      |
| Tawonga Mwase-Vuma (MPH) | Research Fellow, Centre for Social Research, University of Malawi, Malawi; PhD Student/Research Assistant,                                                                                                | Country Lead Investigator (Malawi)                                       | Public health, epidemiology,                                                                                                           |

|                                     |                                                                                                                                                                                                            |                                                                      |                                                                                                                                                               |
|-------------------------------------|------------------------------------------------------------------------------------------------------------------------------------------------------------------------------------------------------------|----------------------------------------------------------------------|---------------------------------------------------------------------------------------------------------------------------------------------------------------|
|                                     | Physical Activity for Health Research Group,<br>Department of Psychological Sciences and Health,<br>University of Strathclyde.                                                                             |                                                                      | measurement of movement behaviors                                                                                                                             |
| Adewale L. Oyeyemi (PhD)            | Associate Professor, College of Health Solutions,<br>Arizona State University, Phoenix, USA. Professor,<br>Department of Physiotherapy, Redeemer's University,<br>Ede, Nigeria                             | Country Lead Investigator (Nigeria);<br>KT/JEDI Sub-Committee Member | Physical activity epidemiology, built environment, health promotion                                                                                           |
| John J. Reilly (PhD)                | Professor of Physical Activity and Public Health Science, University of Strathclyde, Glasgow, Scotland                                                                                                     | Steering Committee Member; Senior Investigator for Malawi            | Global public health surveillance of physical activity, sedentary behaviour, and sleep in children                                                            |
| Justin Richards (DPhil)             | Associate Professor, Te Hau Kori, Te Herenga Waka – Victoria University of Wellington, Wellington, Aotearoa New Zealand; Academic Lead, Ihi Aotearoa – Sport New Zealand, Wellington, Aotearoa New Zealand | Country Co-Lead Investigator (New Zealand)                           | Physical activity population surveillance and inequities                                                                                                      |
| Karen C. Roberts (MSc)              | Senior Epidemiologist, Centre for Surveillance and Applied Research, Public Health Agency of Canada                                                                                                        | Knowledge User and Steering Committee Member                         | Physical activity, sedentary behaviour, sleep and obesity surveillance and measurement                                                                        |
| Mahdi Rostami Haji Abadi (PhD)      | Project Manager, Faculty of Health Sciences, University of Lethbridge                                                                                                                                      | Project Manager; Accelerometry Sub-Committee Member                  | Accelerometry, physical activity in children with chronic conditions, bone health and development in children and youth, sport injuries and rehabilitation    |
| Olga Lucia Sarmiento (MD, PhD, MPH) | Professor at Department of Public Health at School of medicine at Universidad de los Andes in Bogotá, Colombia. Director of the Research Group of Epidemiology at Universidad de los Andes                 | Country Lead Investigator (Colombia)                                 | Physical activity and obesity epidemiology, built environment, health promotion and research translation, implementation science in the Latin American region |

|                                  |                                                                                                                                                                                                                                                                                                             |                                                                              |                                                                                                                                                                                      |
|----------------------------------|-------------------------------------------------------------------------------------------------------------------------------------------------------------------------------------------------------------------------------------------------------------------------------------------------------------|------------------------------------------------------------------------------|--------------------------------------------------------------------------------------------------------------------------------------------------------------------------------------|
| Diego Augusto Santos Silva (PhD) | Associate Professor, Sports Center, Federal University of Santa Catarina, Brazil. Fellow of the National Council for Scientific and Technological Development (CNPq), Brazil. Leader of the Report Card Brazil for physical activity and health in children and adolescents.                                | Country Lead Investigator (Brazil); KT/JEDI Sub-Committee Member             | Physical activity, epidemiology, obesity, public health                                                                                                                              |
| Melody Smith (PhD)               | Professor, School of Nursing, Waipapa Taumata Rau / The University of Auckland. Leader of the Aotearoa New Zealand Physical Activity Report Card for Children and Youth                                                                                                                                     | Co-Investigator (New Zealand)                                                | Physical activity, child and youth health, environmental health, participatory approaches                                                                                            |
| Narayan Subedi (MPH, PhD)        | Leader of Report Card development team, Nepal on Physical Activity for Children and Youth. Assistant Professor (Public Health), Tribhuvan University, Nepal Member - Nepal Development Society (NeDS). Member - Nepal Public Health Foundation (NPHF).                                                      | Country Lead Investigator (Nepal); KT/JEDI Sub-Committee Member              | Physical activity, health promotion, digital health, cardiovascular disease/cardiac rehabilitation, implementation science                                                           |
| Leigh Vanderloo (PhD)            | Scientific Director, ParticipACTION (physical activity thought leadership organization in Canada); Adjunct Professor, School of Occupational Therapy, University of Western Ontario                                                                                                                         | Knowledge User and Steering Committee Member; ; KT/JEDI Sub-Committee Member | Physical activity, sedentary behaviours (screen use), measurement of movement behaviours in children, cardiometabolic risk, school readiness, knowledge translation and mobilization |
| Dyah Anantalia Widyastari (PhD)  | Faculty member, Institute for Population and Social Research, Mahidol University, Thailand; Academic Network and Development Department, Thailand Physical Activity Knowledge Development Centre (TPAK).                                                                                                    | Country Co-Lead Investigator (Thailand)                                      | Demography, population health, health promotion, public health, physical activity.                                                                                                   |
| Oliver W. A. Wilson (PhD)        | Adjunct Research Fellow, Te Hau Kori, Te Herenga Waka – Victoria University of Wellington, Wellington, Aotearoa New Zealand; Postdoctoral Research Fellow, Division of Intramural Research, National Institute on Minority Health and Health Disparities, National Institutes of Health, Bethesda, MD, USA. | Co-Investigator (New Zealand)                                                | Physical activity disparities                                                                                                                                                        |

|                          |                                                                                                                                                                                                                            |                           |                                                                                                               |
|--------------------------|----------------------------------------------------------------------------------------------------------------------------------------------------------------------------------------------------------------------------|---------------------------|---------------------------------------------------------------------------------------------------------------|
| Stephen H. S. Wong (PhD) | Professor, Department of Sports Science & Physical Education; Director, Hong Kong Institute of Educational Research, The Chinese University of Hong Kong, China; Asian Representative, Active Healthy Kids Global Alliance | Steering Committee member | Physical activity and sedentary behaviours surveillance in children, exercise physiology and sports nutrition |
|--------------------------|----------------------------------------------------------------------------------------------------------------------------------------------------------------------------------------------------------------------------|---------------------------|---------------------------------------------------------------------------------------------------------------|

Note: KT/JEDI: knowledge translation, justice, equity, diversity, and inclusion. This list includes individuals who contributed to funding applications and/or to the development of the study protocol. As indicated in the acknowledgements section, many other trainees and staff members are contributing to the project.
