# Supplementary material for: Development and validation of the Global Adolescent and Child Physical Activity Questionnaire (GAC-PAQ) in 14 countries: study protocol
Source: PubMed Central journal article supplement — BMJ Open. 2024 Jul 24;14(7):e082275. doi: 10.1136/bmjopen-2023-082275 (PMC11284885; doi:10.1136/bmjopen-2023-082275), 2024-07-24
Supplement: bmjopen-14-7-s002.pdf [file bmjopen-14-7-s002.pdf]

**Supplementary File 2. Characteristics of included countries.**

| Region / country     | Human development index | Gini index     | World Bank income class | Population size | Official languages | Latitude/ longitude | Weather information for data collection sites                                    |                                      |                                      | Country population density (per km <sup>2</sup> ) |
|----------------------|-------------------------|----------------|-------------------------|-----------------|--------------------|---------------------|----------------------------------------------------------------------------------|--------------------------------------|--------------------------------------|---------------------------------------------------|
|                      |                         |                |                         |                 |                    |                     | City(ies) or region(s)                                                           | Annual mean temperature (°C)         | Annual total precipitation (mm)      |                                                   |
| <b>Africa</b>        |                         |                |                         |                 |                    |                     |                                                                                  |                                      |                                      |                                                   |
| Malawi               | 0.483<br>Low            | 44.7<br>Medium | Low income              | 20,931,751      | English, Chichewa  | -14.0, 33.7         | Blantyre and Zomba                                                               | 22.6                                 | 848                                  | 222                                               |
| Nigeria              | 0.539<br>Low            | 35.1<br>Medium | Lower-middle income     | 223,804,632     | English            | 9.1, 7.5            | Whole country                                                                    | 27.2                                 | 1163                                 | 246                                               |
| <b>Asia</b>          |                         |                |                         |                 |                    |                     |                                                                                  |                                      |                                      |                                                   |
| China                | 0.761<br>High           | 46.7<br>High   | Upper-middle income     | 1,425,671,352   | Chinese            | 39.9, 116.4         | Shanghai                                                                         | 18.1                                 | 1388                                 | 152                                               |
| India                | 0.645<br>Medium         | 35.7<br>Medium | Lower-middle income     | 1,428,627,663   | Hindi, English     | 28.6, 77.2          | Ranjangaon, Pune                                                                 | 24.5                                 | 717                                  | 481                                               |
| Nepal                | 0.602<br>Medium         | 32.8<br>Medium | Lower-middle income     | 30,896,590      | Nepali             | 28.2, 84.3          | Dolkha<br>Syangja<br>Rupandehi and Bardiya                                       | 6.4<br>17.6<br>24.4                  | 694<br>1621<br>1600                  | 216                                               |
| Thailand             | 0.777<br>High           | 34.9<br>Medium | Upper-middle income     | 71,801,279      | Thai               | 13.8, 100.5         | North<br>Central & East<br>Northeast<br>South (East Coast)<br>South (West Coast) | 26.9<br>28.2<br>26.9<br>27.6<br>27.7 | 1536<br>3836<br>1705<br>2521<br>3436 | 95                                                |
| United Arab Emirates | 0.890<br>Very high      | 32.5<br>Medium | High income             | 9,516,871       | Arabic             | 24.5, 54.4          | Dubai<br>Hatta                                                                   | 29.0<br>28.0                         | 125<br>81                            | 862                                               |
| <b>Europe</b>        |                         |                |                         |                 |                    |                     |                                                                                  |                                      |                                      |                                                   |
| Spain                | 0.904<br>Very high      | 33.0<br>Medium | High income             | 47,519,628      | Spanish            | 40.4, -3.7          | Bilbao<br>Seville<br>Madrid                                                      | 14.7<br>19.2<br>14.5                 | 1134<br>539<br>371                   | 95                                                |

|                      |                    |                |                            |             |                             |                 | Badajoz                       | 17.1                 | 447                |    |
|----------------------|--------------------|----------------|----------------------------|-------------|-----------------------------|-----------------|-------------------------------|----------------------|--------------------|----|
| Sweden               | 0.945<br>Very high | 26.9<br>Low    | High<br>income             | 10,612,086  | Swedish                     | 59.4, 18.1      | Stockholm                     | 8.8                  | 472                | 26 |
| <b>North America</b> |                    |                |                            |             |                             |                 |                               |                      |                    |    |
| Canada               | 0.929<br>Very high | 30.3<br>Medium | High<br>income             | 38,781,291  | English,<br>French          | 45.4, -75.7     | Lethbridge<br>Ottawa          | 5.5<br>8.8           | 351<br>1047        | 4  |
| Mexico               | 0.779<br>High      | 41.8<br>Medium | Upper-<br>middle<br>income | 128,455,567 | Spanish                     | 19.4, 99.1      | North<br>Central<br>South     | 29.6<br>28.0<br>31.4 | 400<br>733<br>1531 | 66 |
| <b>Oceania</b>       |                    |                |                            |             |                             |                 |                               |                      |                    |    |
| New Zealand          | 0.937<br>Very high | 36.2<br>Medium | High<br>income             | 5,228,100   | English,<br>Māori,<br>NZSL* | -40.9,<br>174.9 | Auckland<br>Wellington        | 15.0<br>14.1         | 1814<br>1157       | 20 |
| <b>South America</b> |                    |                |                            |             |                             |                 |                               |                      |                    |    |
| Brazil               | 0.765<br>High      | 53.4<br>High   | Upper-<br>middle<br>income | 216,422,446 | Portuguese                  | -15.8,<br>-47.9 | Florianopolis<br>Campo Grande | 20.8<br>23.5         | 1506<br>1573       | 26 |
| Colombia             | 0.767<br>High      | 51.3<br>High   | Upper-<br>middle<br>income | 52,085,168  | Spanish                     | 4.6, -74.1      | Bogotá                        | 12.9                 | 1091               | 47 |

Note: The Human Development Index theoretically ranges from 0 to 1 and the Gini index theoretically ranges from 1 to 100. Weather data was only available at the national level in Nigeria. \* New Zealand Sign Language (NZSL) will not be used for the initial development of the questionnaire.
