# Supplementary material for: Development and validation of the Global Adolescent and Child Physical Activity Questionnaire (GAC-PAQ) in 14 countries: study protocol
Source: PubMed Central journal article supplement — BMJ Open. 2024 Jul 24;14(7):e082275. doi: 10.1136/bmjopen-2023-082275 (PMC11284885; doi:10.1136/bmjopen-2023-082275), 2024-07-24
Supplement: bmjopen-14-7-s004.pdf [file bmjopen-14-7-s004.pdf]

**Supplementary Table 4. GAC-PAQ ethics approval information**

| Country     | Cognitive interviews                                                                                                                                                 | Pilot study                                                                                                                        | Main study                                                                                                                    |
|-------------|----------------------------------------------------------------------------------------------------------------------------------------------------------------------|------------------------------------------------------------------------------------------------------------------------------------|-------------------------------------------------------------------------------------------------------------------------------|
| Brazil      | Ethics Committee for Research Involving Human Subjects of the Federal University of Santa Catarina, Sept 22, 2023, #6,319,243                                        | Ethics Committee for Research Involving Human Subjects of the Federal University of Santa Catarina, Sept 22, 2023, #6,319,243      | Ethics Committee for Research Involving Human Subjects of the Federal University of Santa Catarina, Sept 22, 2023, #6,319,243 |
| Canada      | University of Alberta Research Ethics Board 1, Pro00130125, April 24, 2023<br><br>Children’s Hospital of Eastern Ontario – no cognitive interviews done at this site | University of Alberta Research Ethics Board 1, Pro00138032, January 8, 2024<br><br>Children’s Hospital of Eastern Ontario, Pending | University of Alberta Research Ethics Board 1, Pending<br><br>Children’s Hospital of Eastern Ontario, Pending                 |
| China       | Institution of Review Board at Shanghai University of Sport, No. 102772023RT112                                                                                      | Institution of Review Board at Shanghai University of Sport, No. 102772023RT112                                                    | Institution of Review Board at Shanghai University of Sport, No. 102772023RT112                                               |
| Colombia    | Comité de Etica de la Investigacion, Aug 1, 2023, #2023080121                                                                                                        | Comité de Etica de la Investigacion, Jan 18, 2024, #202302281                                                                      | Comité de Etica de la Investigacion, Pending                                                                                  |
| India       | Ethics Committee Jehangir Clinical Development Centre Pvt. Ltd., JCDC/BHR/23/004, Aug 2, 2023                                                                        | Ethics Committee Jehangir Clinical Development Centre Pvt. Ltd., JCDC/BHR/23/004, Aug 2, 2023                                      | Ethics Committee Jehangir Clinical Development Centre Pvt. Ltd., JCDC/BHR/23/004, Aug 2, 2023                                 |
| Malawi      | University of Malawi Research Ethics Committee. P.10/23/306, Nov 2, 2023                                                                                             | University of Malawi Research Ethics Committee. Pending.                                                                           | University of Malawi Research Ethics Committee. Pending.                                                                      |
| Mexico      | Comité de Ética en Invesgigación del Instituto Nacional de Salud Pública March 3rd, 2023                                                                             | Comité de Ética en Invesgigación del Instituto Nacional de Salud Pública, Pending                                                  | Comité de Ética en Invesgigación del Instituto Nacional de Salud Pública, Pending                                             |
| Nepal       | Nepal Health Research Council, Government of Nepal. Ref no: 966, Jan 5, 2024                                                                                         | Nepal Health Research Council, Government of Nepal. Ref no: 966, Jan 5, 2024                                                       | Nepal Health Research Council, Government of Nepal. Ref no: 966, Jan 5, 2024                                                  |
| New Zealand | Human Ethics Committee, Te Herenga Waka - Victoria University of Wellington, September 8, 2023, No. 31142                                                            | Human Ethics Committee, Te Herenga Waka - Victoria University of Wellington, January 11, 2024, No. 31341                           | Human Ethics Committee, Te Herenga Waka - Victoria University of Wellington, January 11, 2024, No. 31341                      |

|                      |                                                                                                                               |                                                                                                                               |                                                                                                                               |
|----------------------|-------------------------------------------------------------------------------------------------------------------------------|-------------------------------------------------------------------------------------------------------------------------------|-------------------------------------------------------------------------------------------------------------------------------|
| Nigeria              | Redeemer's University Ethics Committee, June 28, 2023, #RUN/REC/2023/052                                                      | Redeemer's University Ethics Committee, June 28, 2023, #RUN/REC/2023/052                                                      | Redeemer's University Ethics Committee, June 28, 2023, #RUN/REC/2023/052                                                      |
| Spain                | Comisión Ética para Investigación con seres Humanos, June 5, 2023, # 23/4-2                                                   | Comisión Ética para Investigación con seres Humanos, June 5, 2023, # 23/4-2                                                   | Comisión Ética para Investigación con seres Humanos, June 5, 2023, # 23/4-2                                                   |
| Sweden               | Swedish Ethical Review Authority, Oct 2, 2023, #2023-04418-01                                                                 | Swedish Ethical Review Authority, March 22, 2024, 2024-00569-01                                                               | Swedish Ethical Review Authority, March 22, 2024, 2024-00569-01                                                               |
| Thailand             | Institutional Review Board, Institute for Population and Social Research, Mahidol University, IPSR-IRB-2023-133, 27 July 2023 | Institutional Review Board, Institute for Population and Social Research, Mahidol University, IPSR-IRB-2023-133, 27 July 2023 | Institutional Review Board, Institute for Population and Social Research, Mahidol University, IPSR-IRB-2023-133, 27 July 2023 |
| United Arab Emirates | Mohammed Bin Rashid University Institutional Review Board, MBRU-IRB-2024-199, 17 January 2024                                 | Mohammed Bin Rashid University Institutional Review Board, Pending                                                            | Mohammed Bin Rashid University Institutional Review Board, Pending                                                            |

Note: Some countries have obtained ethics approval for the entire study whereas others get approval for each phase requiring human participants separately. Data collection for the content validation survey was done exclusively through the coordinating centre (University of Lethbridge) following approval from the University of Alberta Research Ethics Board 1: protocol # Pro00126063, Jan 24, 2023.
